# Supplementary material for: Two-dimensional ordering of benzenethiol self-assembled monolayers guided by displacement of cyclohexanethiols on Au(111)
Source: Royal Society of Chemistry journal article supplement (doi:10.1039/b809261c), 2008-01-01
Supplement: b809261c.pdf [file b809261c.pdf]

## Supplementary Information

### Two-dimensional ordering of benzenethiol self-assembled monolayers induced by displacement of cyclohexanethiols on Au(111)

Hungu Kang,<sup>a</sup> Haiwon Lee,<sup>a</sup> Masahiko Hara,<sup>b,c</sup> and Jaegeun Noh\*<sup>a</sup>

<sup>a</sup>Department of Chemistry, Hanyang University, 17 Haengdang-dong, Seongdong-gu, Seoul 133-791, Korea

<sup>b</sup>Flucto-order Functions Asian Collaboration Team, RIKEN, 2-1 Hirosawa, Wako, Saitama 351-0198, Japan.

<sup>c</sup>Department of Electronic Chemistry, Tokyo Institute of Technology, 4259 Nagatsuta, Midoriku, Yokohama 226-8502, Japan

**Figure S1.** Cyclic voltamograms of (a) bare Au(111) electrode, (b) CHT SAM-modified Au(111) electrode, and (c) BT SAM-modified electrode obtained after displacement of preadsorbed CHT molecules by BT molecules for 90 min. Note that BT SAM-modified electrode shows a reduced current, indicating that BT SAMs formed after displacement efficiently blocked the electrode reaction of ferrocyanide.

**Figure S2.** Water static contact angles measured from (a) CHT SAMs and (b) BT SAMs Au(111) formed in a 1 mM ethanol solution of CHT or BT after immersion for 1 day, and (c) BT SAMs on Au(111) formed after displacement of preadsorbed CHT molecules by BT molecules for 90 min. Note that after displacement the contact angle of BT SAMs almost reached to that of BT SAMs formed in a 1 mM BT solution.

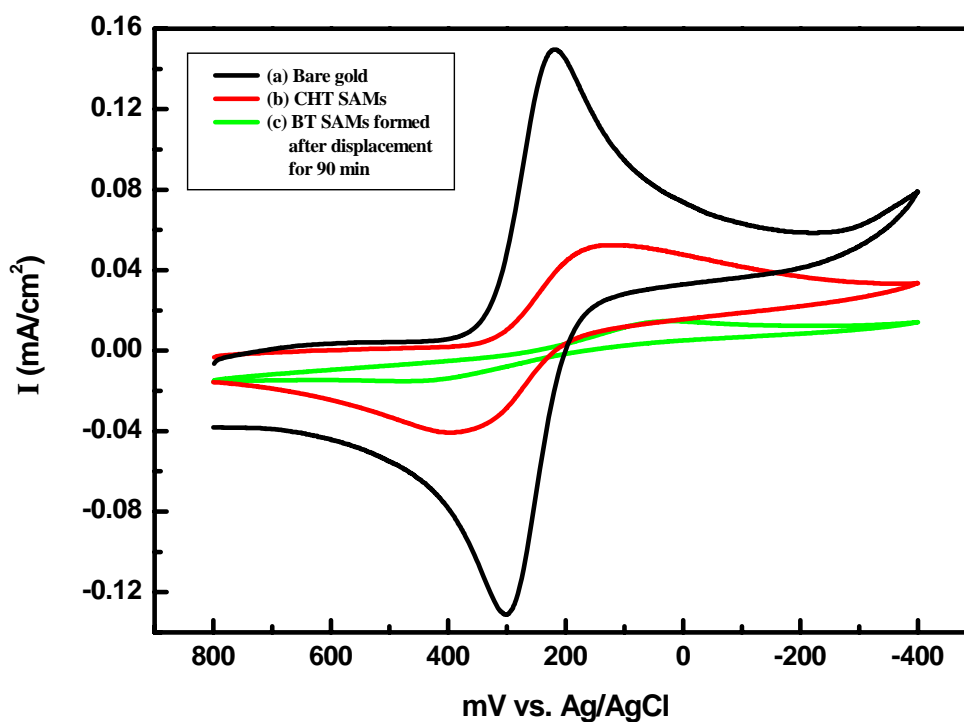

**Figure S1.** Cyclic voltammograms of (a) bare Au(111) electrode, (b) CHT SAM-modified Au(111) electrode, and (c) BT SAM-modified electrode obtained after displacement of preadsorbed CHT molecules by BT molecules for 90 min. Note that BT SAM-modified electrode shows a reduced current, indicating that BT SAMs formed after displacement efficiently blocked the electrode reaction of ferrocyanide.

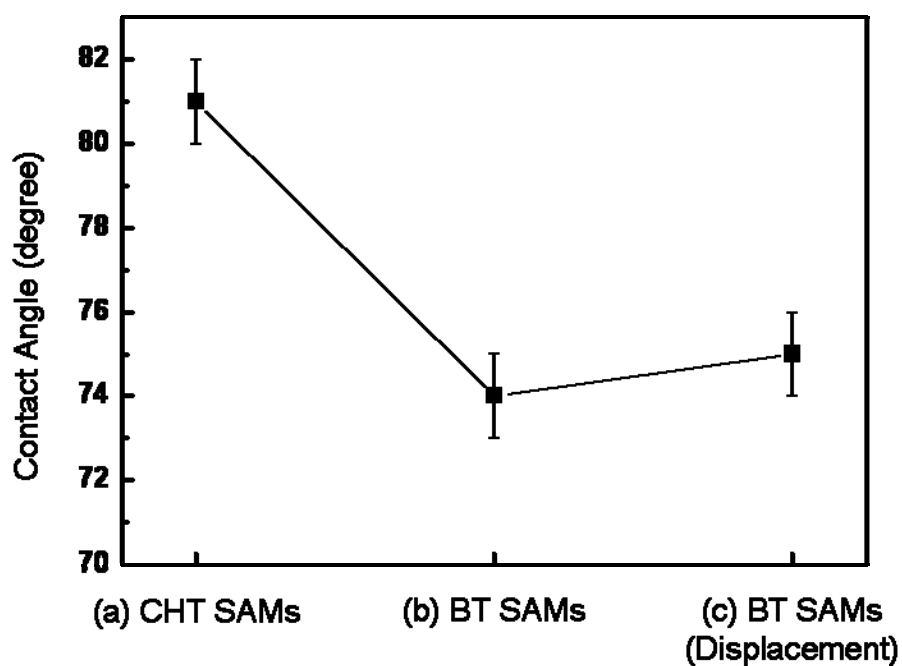

**Figure S2.** Water static contact angles measured from (a) CHT SAMs and (b) BT SAMs Au(111) formed in a 1 mM ethanol solution of CHT or BT after immersion for 1 day, and (c) BT SAMs on Au(111) formed after displacement of preadsorbed CHT molecules by BT molecules for 90 min. Note that after displacement the contact angle of BT SAMs almost reached to that of BT SAMs formed in a 1 mM BT solution.
